# Supplementary material for: Molecular Design and Virtual Screening of EZH2 Inhibitors Based on GRU Networks
Source: Research Square preprint supplement (doi:10.21203/rs.3.rs-7254831/v1), 2025-09-10
Supplement: Supplementary file 1 [file 7bbd176e9847239f9c8373e6.docx]

**Supplementary Information**

**Figure S1 MM/GBSA calculated free energy contribution of 11 critical residues**

**
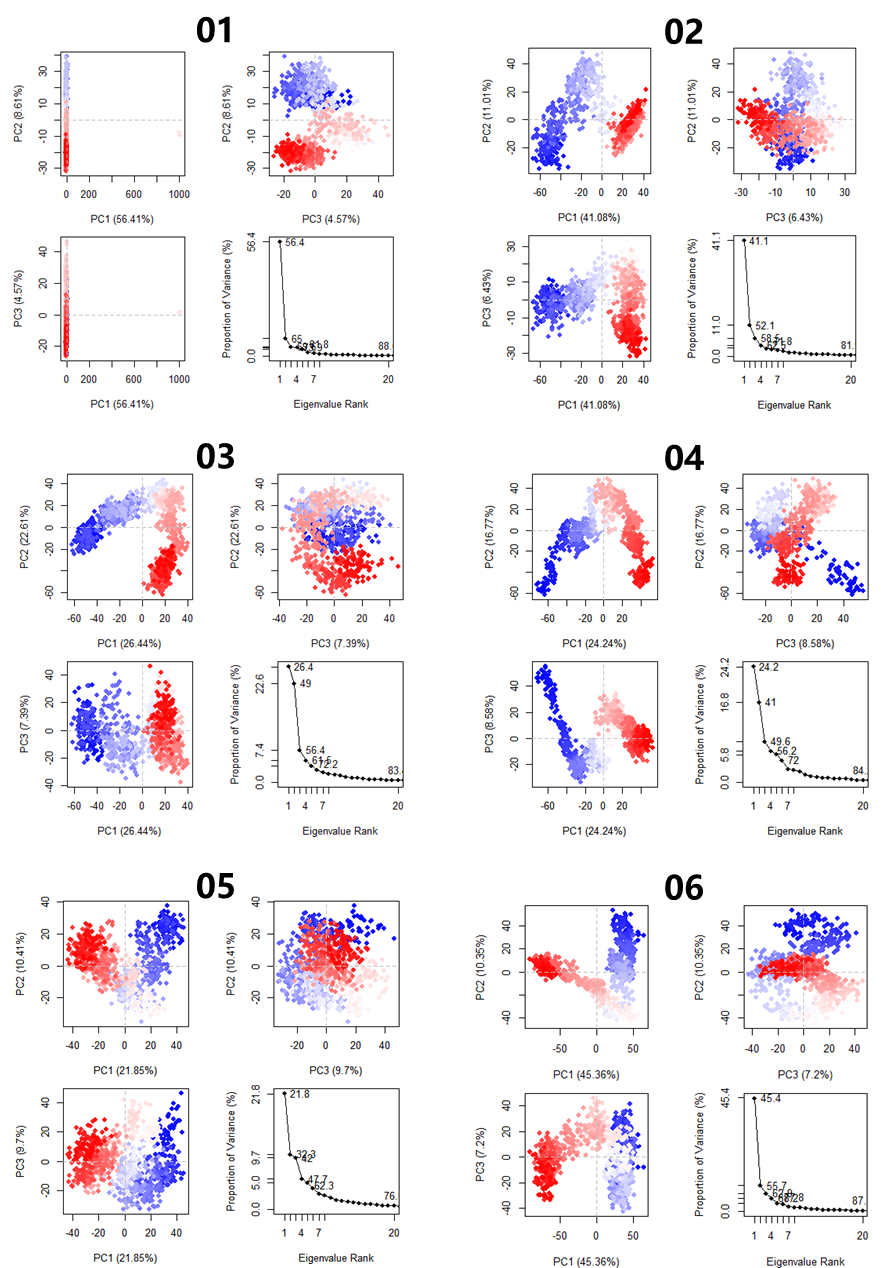
**

**
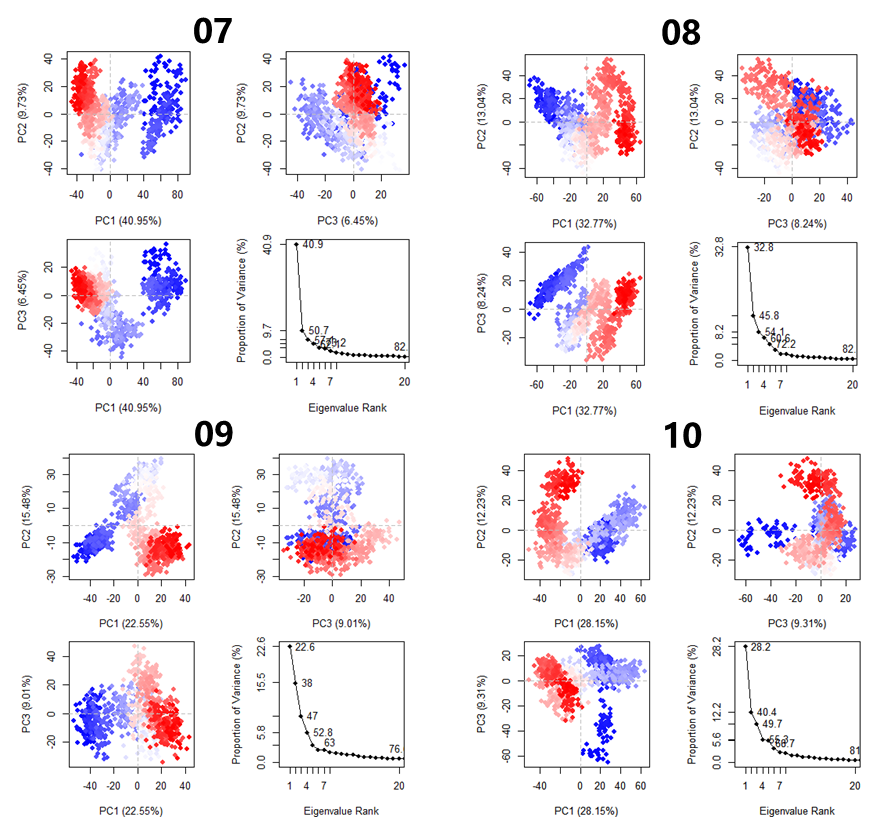
**

**Figure S2 Analysis of** **10 composite components (PCA)**

**
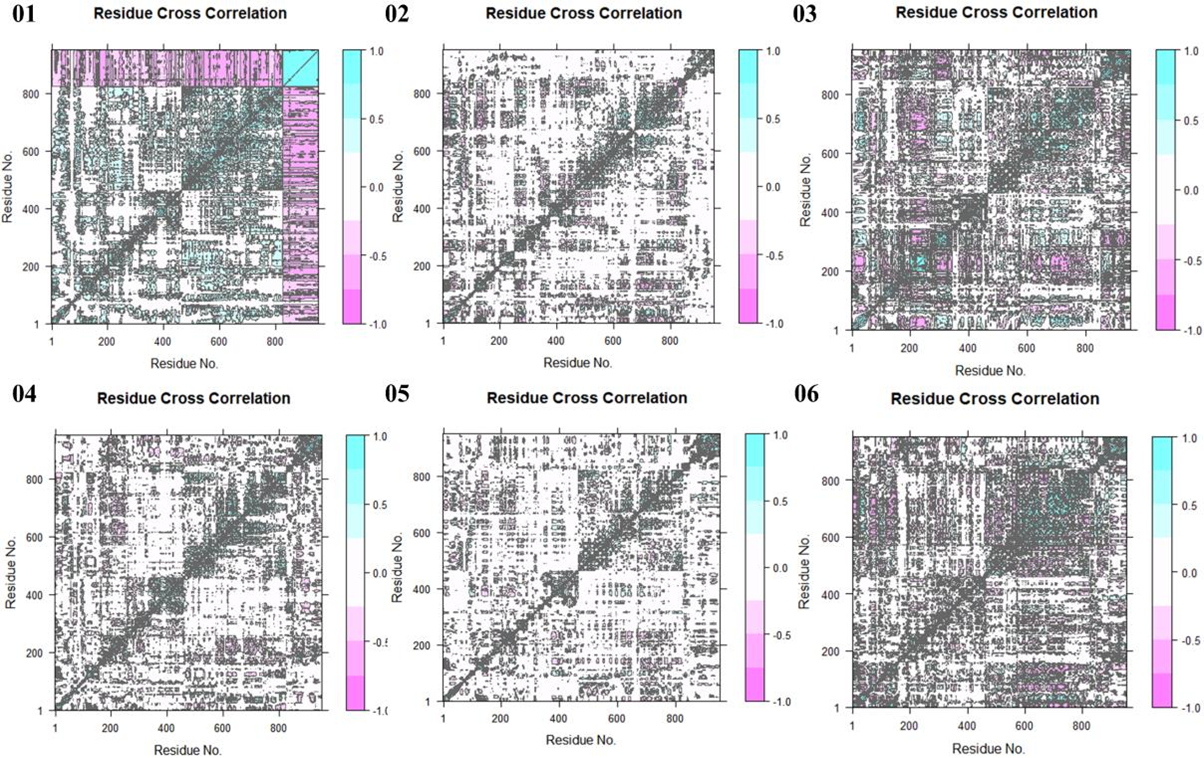

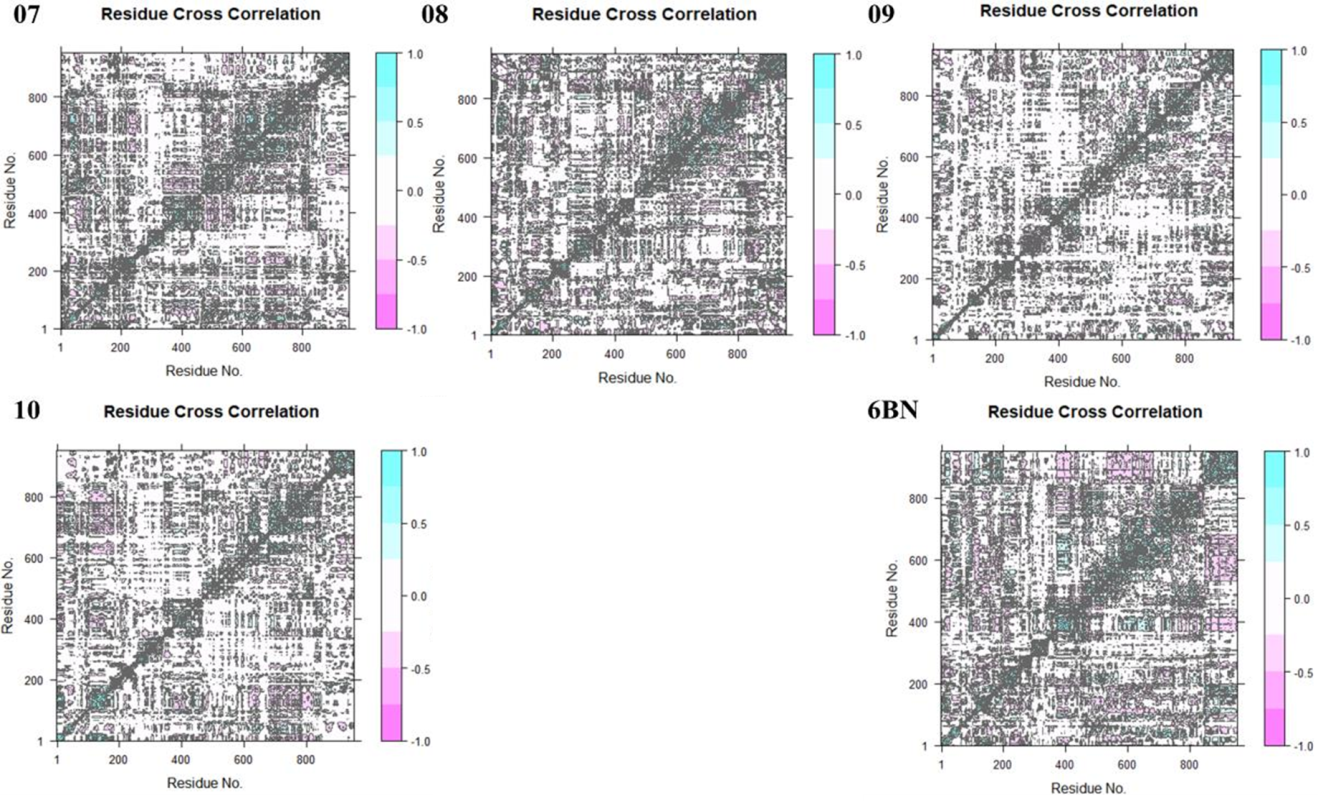
**

**Figure S3 Dynamical Cross-Correlation Matrix**

**
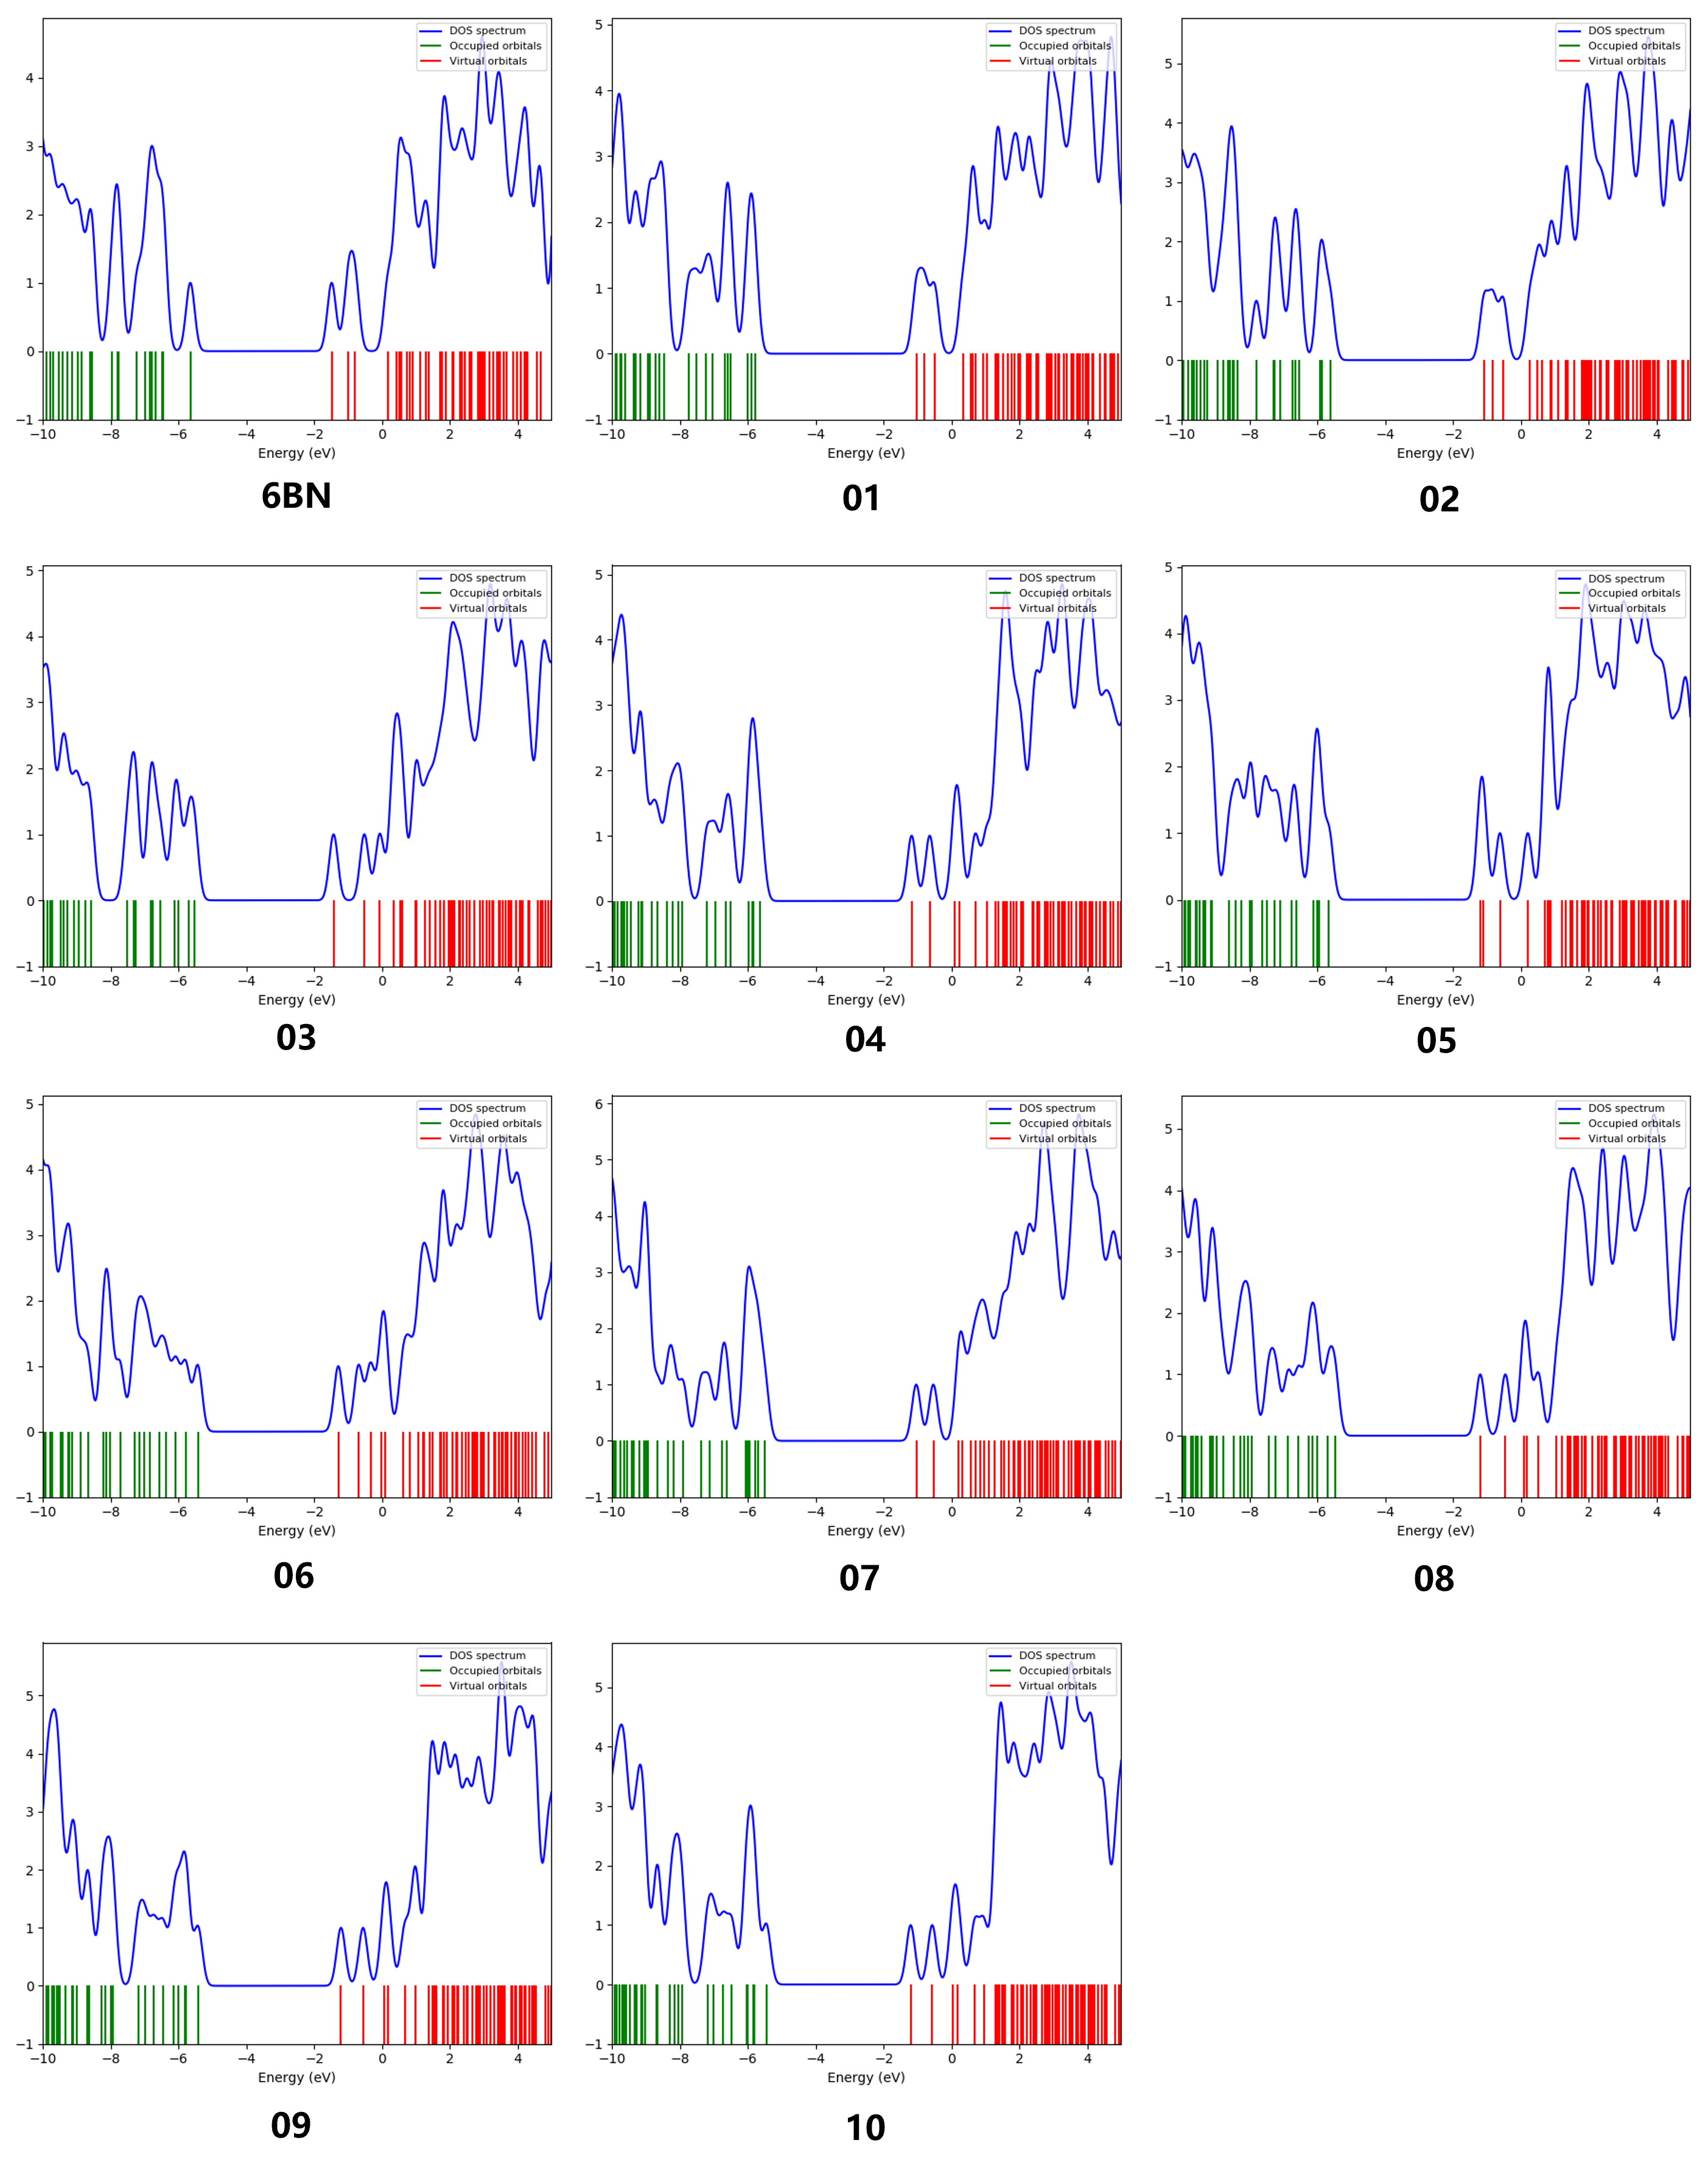
**

**Figure S4 DOS spectrum diagram of 11 composite components**

**
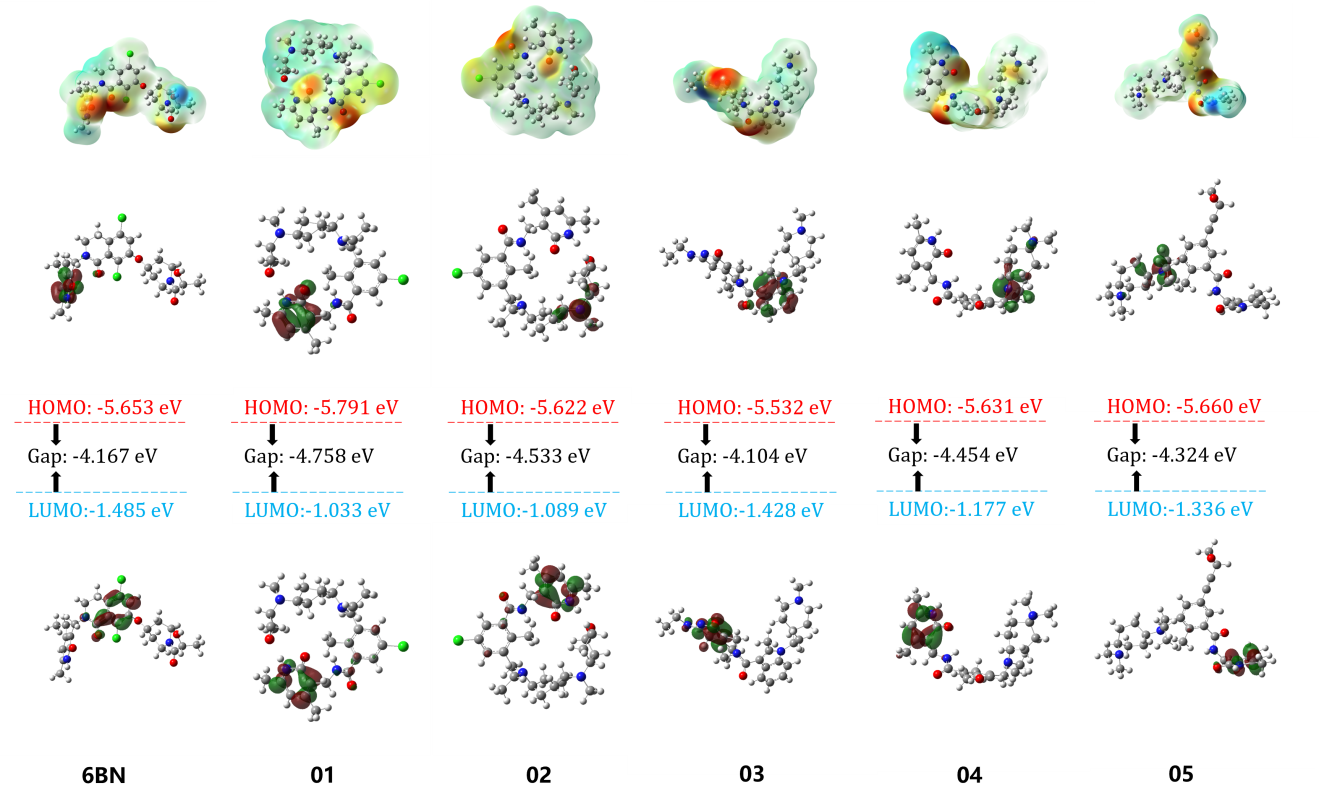
**

**
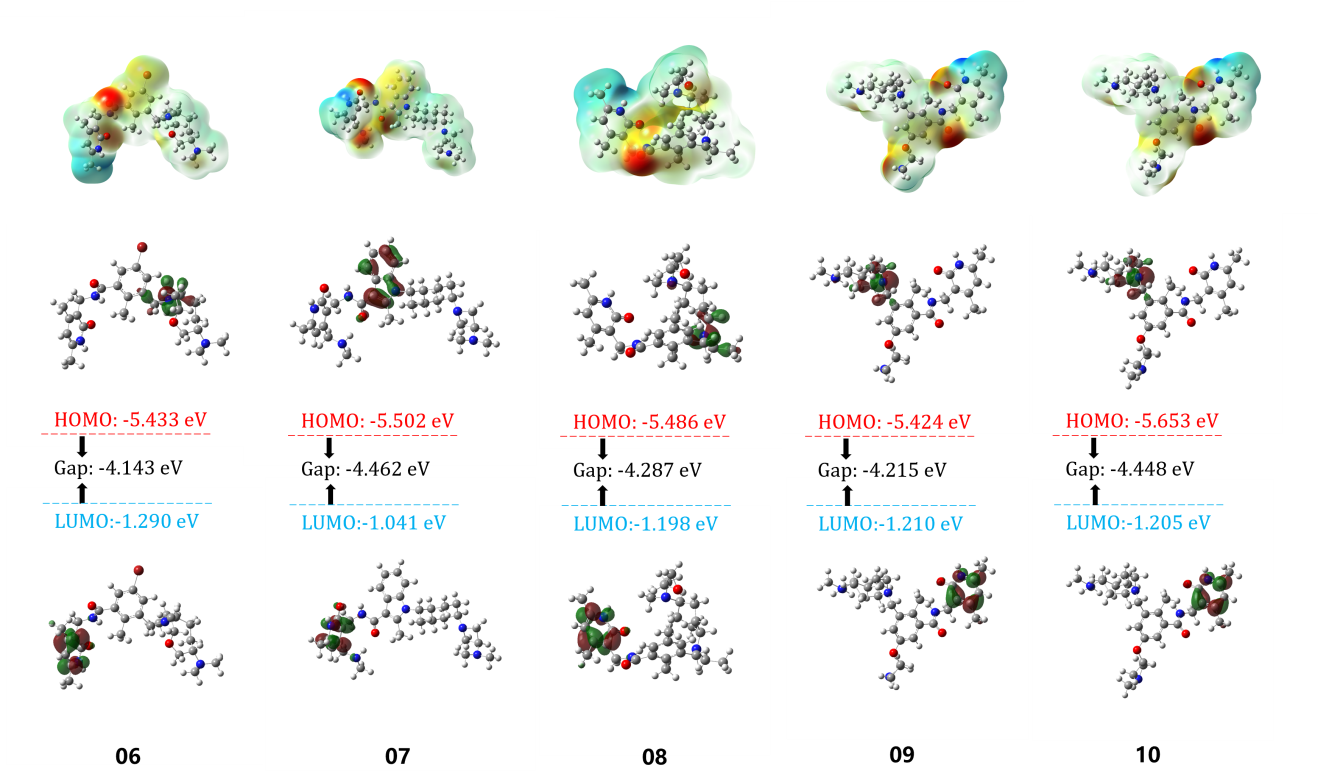
Figure S5 The HOMO, LUMO and MESP of 11 compounds**

**Table S1 ADME /T properties of the template compound and the novel compounds**

| No. | Abs | Dis | Met CYP  (substrate) | | Met CYP  (Inhibitor) | | | Ex |  | Tox | | | |
| --- | --- | --- | --- | --- | --- | --- | --- | --- | --- | --- | --- | --- | --- |
| HIA | VDss | 2D6 | 3A4 | 1A2 | 2D6 | 3A4 | CL tot | AMES | | H-HT | Skin Sen |
| 6BN | 70.883 | 1.101 | No | Yes | No | No | Yes | 1.195 | No | | Yes | No |
| 01 | 88.309 | 1.655 | No | Yes | No | No | Yes | 1.161 | No | | Yes | No |
| 02 | 87.531 | 1.713 | No | Yes | No | Yes | Yes | 0.922 | No | | Yes | No |
| 03 | 90.139 | 1.409 | No | Yes | No | Yes | Yes | 0.492 | No | | Yes | No |
| 04 | 89.718 | 1.738 | No | Yes | No | No | Yes | 0.904 | No | | Yes | No |
| 05 | 90.013 | 1.683 | No | Yes | No | No | Yes | 0.985 | No | | Yes | No |
| 06 | 88.148 | 1.562 | No | Yes | No | Yes | No | 0.647 | No | | Yes | No |
| 07 | 91.032 | 1.960 | No | Yes | No | No | Yes | 0.700 | No | | Yes | No |
| 08 | 89.715 | 1.744 | No | Yes | No | Yes | Yes | 1.150 | No | | Yes | No |
| 09 | 88.125 | 2.160 | No | Yes | No | No | Yes | 1.005 | No | | Yes | No |
| 10 | 87.925 | 2.206 | No | Yes | No | No | Yes | 0.836 | No | | Yes | No |
